# Supplementary material
Source: PubMed Central journal article supplement (PMC5274578)
Supplement: NIHMS830368-supplement-01.pdf [file NIHMS830368-supplement-01.pdf]

**Table 2, online. Genus-level SS-ANOVA comparisons of control and treatment groups over time**

| Genus                       | Interval Start <sup>1</sup> | Interval End <sup>1</sup> | Area <sup>2</sup> | P value <sup>3</sup> | Adjusted P <sup>4</sup> |
|-----------------------------|-----------------------------|---------------------------|-------------------|----------------------|-------------------------|
| <i>Escherichia-Shigella</i> | 1                           | 9                         | -72495.0          | <0.0001              | <0.0001                 |
| <i>Corynebacterium</i>      | 1                           | 6                         | 1533.9            | 0.0066               | 0.0089                  |
| <i>Geobacillus</i>          | 1                           | 9                         | 948.5             | <0.0001              | <0.0001                 |
| <i>Salmonella</i>           | 1                           | 9                         | -202.9            | <0.0001              | <0.0001                 |
| <i>Serratia</i>             | 2                           | 9                         | -10483.0          | <0.0001              | <0.0001                 |
| <i>Pantoea</i>              | 2                           | 9                         | -9964.6           | <0.0001              | <0.0001                 |
| <i>Clostridium</i>          | 2                           | 9                         | -3209.4           | <0.0001              | <0.0001                 |
| <i>Tatumella</i>            | 2                           | 9                         | -121.6            | <0.0001              | <0.0001                 |
| <i>Streptococcus</i>        | 3                           | 9                         | -5586.1           | <0.0001              | <0.0001                 |
| <i>Erwinia</i>              | 3                           | 7                         | 14.0              | 0.0435               | 0.0436                  |
| <i>Cedecea</i>              | 4                           | 9                         | -100.7            | <0.0001              | <0.0001                 |
| <i>Citrobacter</i>          | 4                           | 9                         | -34.2             | 0.0436               | 0.0436                  |

Color coding indicates early (green), mid (blue), and late (red) changes.

<sup>1</sup>Start and End indicate the boundaries of the study weeks accounting for differential abundance between groups. Genera are shown with a significant difference between treatment and control groups after Week 0 (following start of treatment) and sustained over at least 4 weeks.

<sup>2</sup>Positive area values indicate the magnitude of greater abundance in Treatment group compared to the Control group. Negative values indicate greater abundance in the Control group compared to the Treatment group.

<sup>3</sup>P values were based on 10,000 scrambled permutations of the groups and SS-ANOVA comparisons to observed data.

<sup>4</sup>P values were adjusted for multiple comparisons using the Benjamini-Hochberg test.

**Table 3, online. Imputed KEGG Pathway Abundance Comparisons of Treatment Groups**

| KEGG2                                     | KEGG3 <sup>1</sup>                              | Interval start <sup>2</sup> | Interval end <sup>2</sup> | Area <sup>3</sup> | P       | Adjusted P <sup>4</sup> |
|-------------------------------------------|-------------------------------------------------|-----------------------------|---------------------------|-------------------|---------|-------------------------|
| Lipid Metabolism                          | Fatty acid metabolism                           | 1                           | 6                         | -20.9             | 0.0020  | 0.0053                  |
| Metabolism of Terpenoids and Polyketides  | Geraniol degradation                            | 1                           | 6                         | -13.0             | 0.0031  | 0.0066                  |
| Amino Acid Metabolism                     | Lysine degradation                              | 1                           | 7                         | -17.7             | 0.0004  | 0.0025                  |
| Xenobiotics Biodegradation and Metabolism | Fluorobenzoate degradation                      | 1                           | 8                         | -4.3              | 0.0010  | 0.0040                  |
|                                           | Benzoate degradation                            | 1                           | 7                         | -22.5             | <0.0001 | <0.0001                 |
|                                           | Caprolactam degradation                         | 1                           | 7                         | -12.0             | 0.0004  | 0.0025                  |
| Infectious Diseases                       | Bacterial invasion of epithelial cells          | 2                           | 9                         | 1.5               | <0.0001 | <0.0001                 |
|                                           | Influenza A                                     | 2                           | 7                         | -0.8              | 0.0005  | 0.0029                  |
|                                           | Toxoplasmosis                                   | 2                           | 7                         | -0.8              | 0.0010  | 0.0040                  |
|                                           | Shigellosis                                     | 3                           | 9                         | 0.4               | <0.0001 | <0.0001                 |
| Xenobiotics Biodegradation and Metabolism | Metabolism of xenobiotics by cytochrome P450    | 2                           | 8                         | -7.3              | <0.0001 | <0.0001                 |
|                                           | Styrene degradation                             | 2                           | 6                         | -2.5              | 0.0041  | 0.0079                  |
|                                           | Chlorocyclohexane and chlorobenzene degradation | 2                           | 6                         | -2.4              | 0.0019  | 0.0053                  |
|                                           | Drug metabolism - cytochrome P450               | 2                           | 8                         | -7.7              | <0.0001 | <0.0001                 |
| Lipid Metabolism                          | Secondary bile acid biosynthesis                | 2                           | 9                         | 2.2               | <0.0001 | <0.0001                 |
|                                           | Glycerolipid metabolism                         | 3                           | 9                         | 9.2               | 0.0018  | 0.0052                  |
| Amino Acid Metabolism                     | Tryptophan metabolism                           | 2                           | 6                         | -11.8             | 0.0010  | 0.0040                  |
|                                           | Phenylalanine metabolism                        | 3                           | 7                         | -7.8              | 0.0029  | 0.0065                  |
| Metabolism of Other Amino Acids           | beta-Alanine metabolism                         | 2                           | 7                         | -13.2             | 0.0006  | 0.0032                  |
| Carbohydrate Metabolism                   | Galactose metabolism                            | 3                           | 9                         | 27.8              | <0.0001 | <0.0001                 |
| Metabolism of Cofactors and Vitamins      | Porphyrin and chlorophyll metabolism            | 3                           | 7                         | -11.9             | 0.0023  | 0.0055                  |
| Carbohydrate Metabolism                   | Amino sugar and nucleotide sugar metabolism     | 4                           | 9                         | 31.1              | 0.0026  | 0.0060                  |
|                                           | Fructose and mannose metabolism                 | 4                           | 9                         | 32.5              | 0.0017  | 0.0052                  |
| Enzyme Families                           | Cytochrome P450                                 | 4                           | 9                         | -0.04             | 0.0009  | 0.0040                  |
| Nucleotide Metabolism                     | Purine metabolism                               | 4                           | 9                         | 37.6              | 0.0023  | 0.0055                  |
|                                           | Pyrimidine metabolism                           | 5                           | 9                         | 22.0              | 0.0020  | 0.0053                  |
| Glycan Biosynthesis and Metabolism        | Glycosphingolipid biosynthesis - globo series   | 4                           | 9                         | 2.5               | <0.0001 | <0.0001                 |
|                                           | Glycosphingolipid biosynthesis - ganglio series | 5                           | 9                         | 0.7               | 0.0047  | 0.0082                  |
|                                           | Other glycan degradation                        | 5                           | 9                         | 3.3               | 0.0001  | 0.0007                  |
| Metabolism of Cofactors and Vitamins      | Lipoic acid metabolism                          | 5                           | 9                         | 1.9               | 0.0046  | 0.0082                  |

Color coding indicates early (green), mid (blue), and late (red) changes.

<sup>1</sup>KEGG Level 3 categories are shown where the adjusted *P* was  $\leq 0.01$  for a time interval of  $\geq 4$  weeks duration after initiation of treatment, and the Level 1 category was *Metabolism* or the Level 2 category was *Infectious Diseases*.

<sup>2</sup>Start and End indicate the boundaries of the study weeks with differential abundance between groups.

<sup>3</sup>Positive area values indicate greater abundance in Treatment group compared to the Control group. Negative values indicate greater abundance in the Control group compared to the Treatment group.

<sup>4</sup>*P* values were adjusted for multiple comparisons using the Benjamini-Hochberg test.
